# Supplementary material for: A vertically layered MoS2/Si heterojunction for an ultrahigh and ultrafast photoresponse photodetector
Source: Royal Society of Chemistry journal article supplement (doi:10.1039/c7tc05896a), 2018-01-01
Supplement: c7tc05896a1.pdf [file c7tc05896a1.pdf]

## Supporting Information

### Vertical oriented MoS<sub>2</sub>/Si heterojunction for ultrahigh and ultrafast photoresponse photodetector

Shuang Qiao,<sup>a,b,c</sup> Ridong Cong,<sup>a</sup> Jihong Liu,<sup>a</sup> Baolai Liang,<sup>a</sup> Guangsheng Fu,<sup>a</sup> Wei Yu<sup>1,a,†</sup> Kailiang Ren,<sup>b,c,†</sup> Shufang Wang,<sup>a</sup> and Caofeng Pan<sup>b,c,†</sup>

<sup>a</sup> Hebei Key Laboratory of Optic-Electronic Information and Materials, College of Physics Science and Technology, Hebei University, Baoding 071002, P. R. China.

†E-mail: [yuwei@hbu.edu.cn](mailto:yuwei@hbu.edu.cn)

<sup>b</sup> Beijing Institute of Nanoenergy and Nanosystems, Chinese Academy of Sciences, Beijing, 100083, China.

<sup>c</sup> School of Nanoscience and Technology, University of Chinese Academy of Sciences, Beijing 100049, P. R. China.

†E-mail: [renkailiang@binn.cas.cn](mailto:renkailiang@binn.cas.cn), and [cfpan@binn.cas.cn](mailto:cfpan@binn.cas.cn)

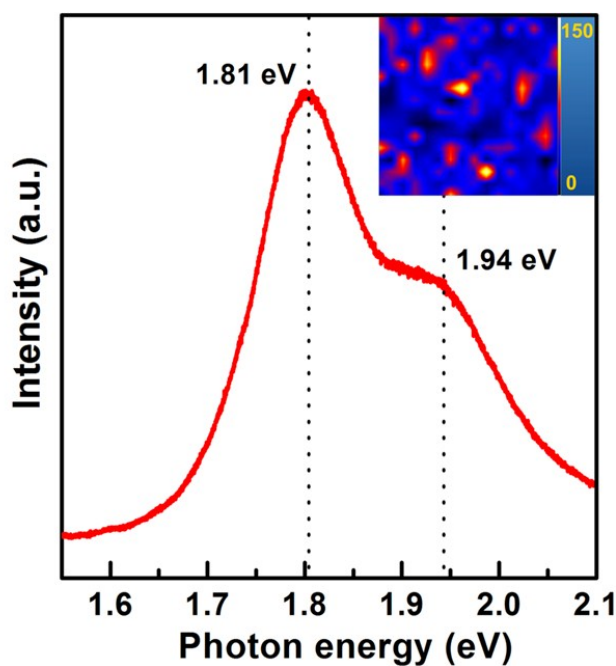

Fig. S1 PL spectra of the V-MoS<sub>2</sub> nanosheets with inset the PL mapping result.

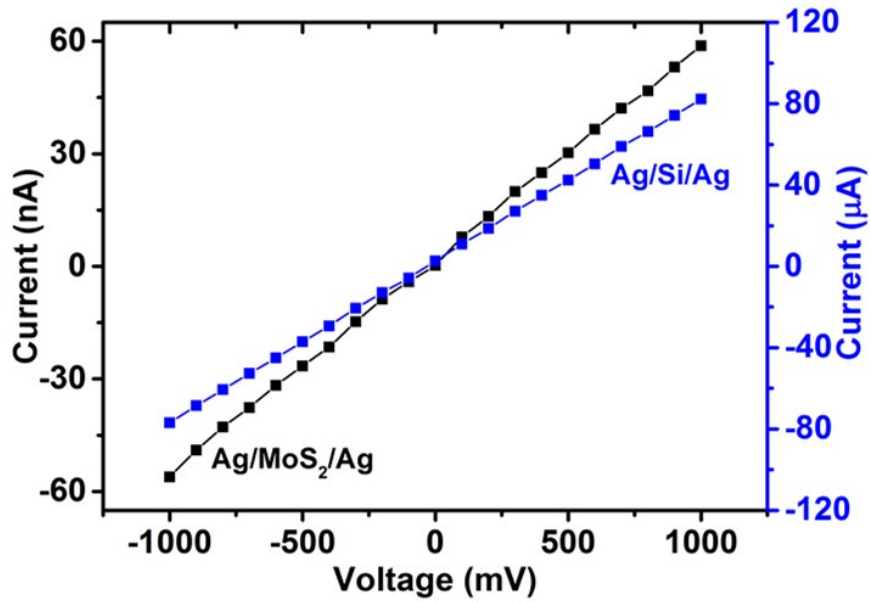

Fig. S2 The I-V curves for the Ag/MoS<sub>2</sub>/Ag structure and the Ag/Si/Ag structure, respectively.

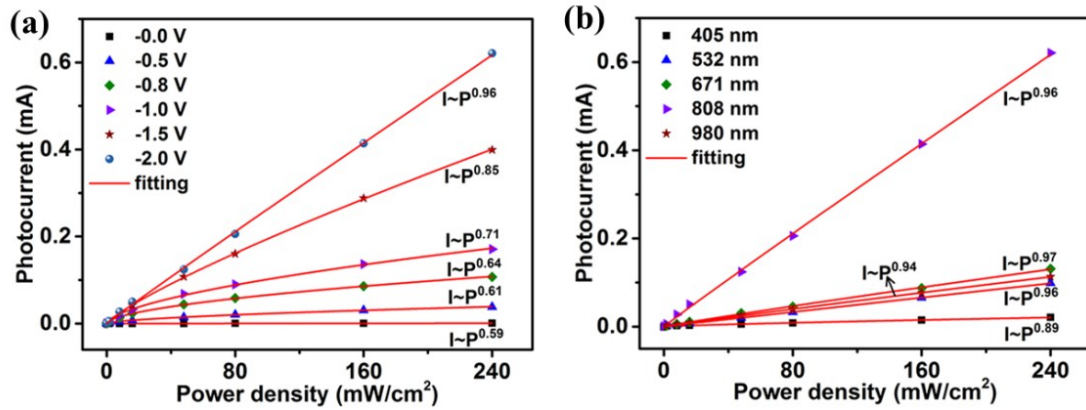

Fig. S3 (a) Photocurrent as a function of incident laser density at bias of 0 V, -0.5 V, -0.8 V, -1.0 V, -1.5 V, and -2 V. (b) Photocurrent as a function of incident laser density at bias of -2 V for different laser wavelengths.

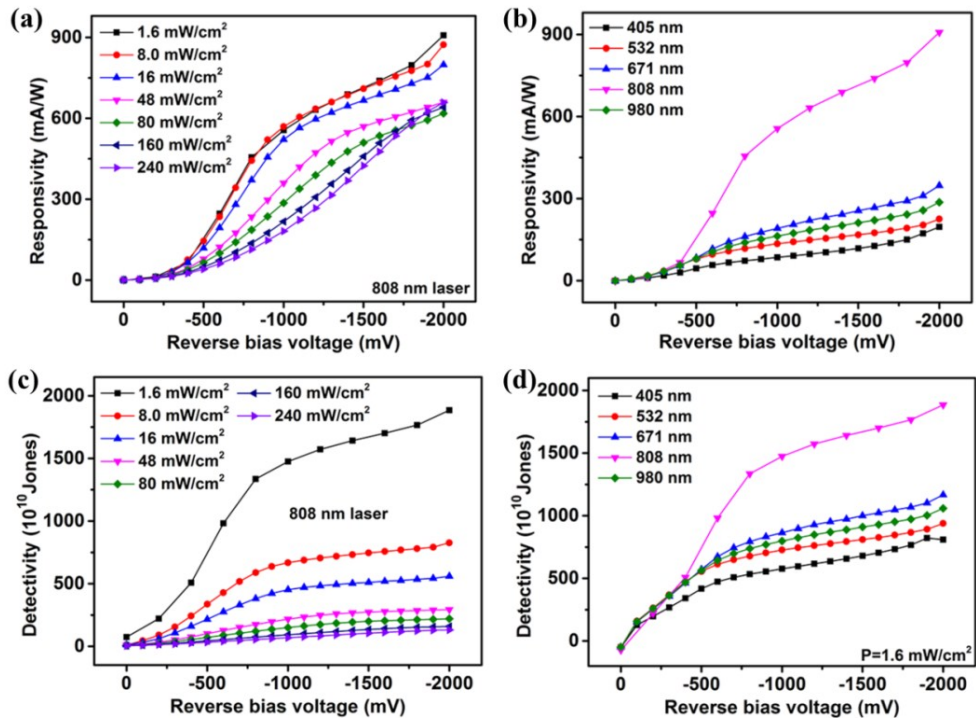

**Fig. S4** Responsivity as a function of reverse bias voltage (a) under different illumination densities for 808 nm laser, and (b) under different wavelengths with illumination density of 1.6 mW/cm<sup>2</sup>. Detectivity as a function of reverse bias voltage (c) under different illumination densities for 808 nm laser, and (d) under different wavelengths with illumination density of 1.6 mW/cm<sup>2</sup>.

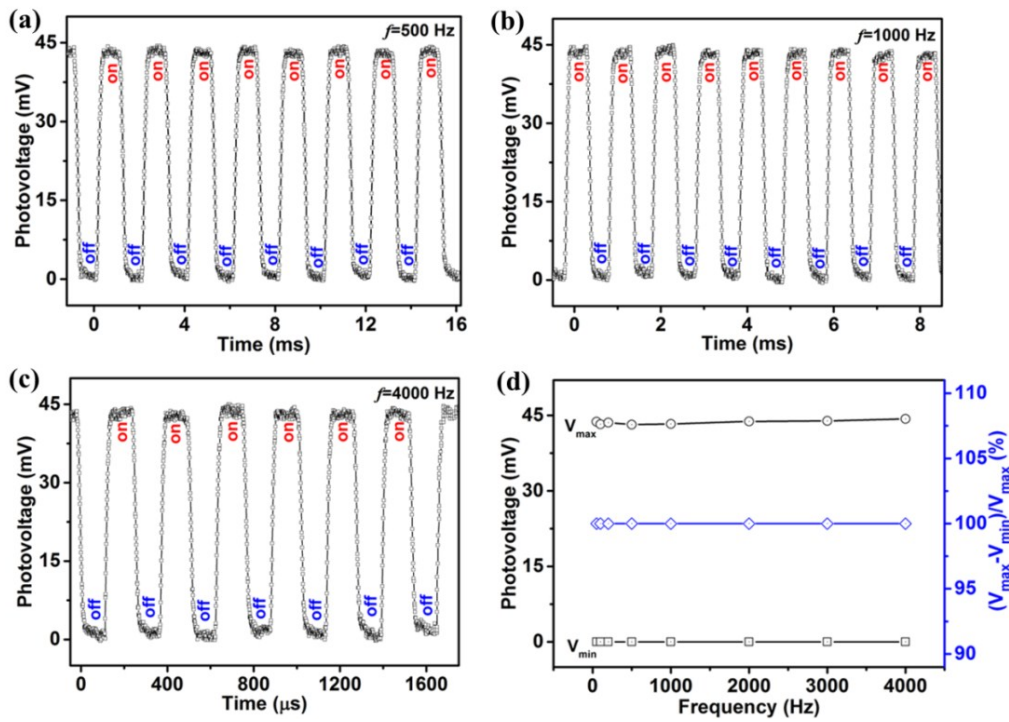

**Fig. S5** Time-dependent photovoltages at frequencies of (a) 500 Hz, (b) 1000 Hz, and (c) 4000 Hz. (d)  $V_{max}$ ,  $V_{min}$ , and relative balance  $(V_{max} - V_{min})/V_{max}$  as a function of chopper frequency.

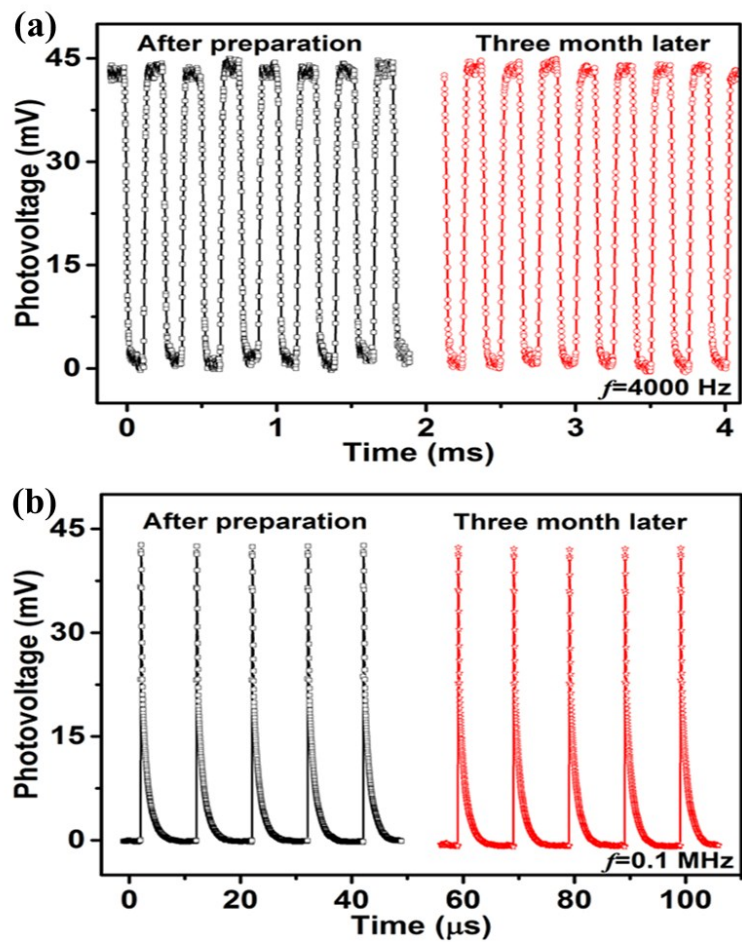

**Fi. S6** Time-dependent photovoltages of the as-fabricated device and the same device after storage in air for three months under laser pulse frequency of (a) 4000 Hz (by chopper), and (b) 0.1 MHz (by fs-width laser).
